1 RUNNING title: Embryology of temnopleurids

2

3 **Morphological diversity of blastula formation and gastrulation in temnopleurid sea urchins**

4

5 Chisato Kitazawa<sup>1,\*</sup>, Tsubasa Fujii<sup>2</sup>, Yuji Egusa<sup>1</sup>, Miéko Komatsu<sup>3</sup>, and Akira Yamanaka<sup>4</sup>

6

7 <sup>1</sup>*Biological Institute, Faculty of Education, Yamaguchi University, Yoshida 1677-1, Yamaguchi 753-8513,*

8 *Japan*

9 <sup>2</sup>*Biological Institute, Graduate School of Education, Yamaguchi University, Yoshida 1677-1, Yamaguchi*

10 *753-8513, Japan*

11 <sup>3</sup>*Department of Biology, Graduate School of Science and Engineering for Research, University of*

12 *Toyama, Toyama 930-8555, Japan*

13 <sup>4</sup>*Laboratory of Environmental Biology, Graduate School of Medicine, Yamaguchi University, Yoshida*

14 *1677-1, Yamaguchi 753-8512, Japan*

15

16 <sup>\*</sup>To whom correspondence and reprint requests should be addressed.

17 Tel: +81-83-933-5347. Fax: +81-83-933-5347.

18 E-mail: [chisak@yamaguchi-u.ac.jp](mailto:chisak@yamaguchi-u.ac.jp)

19 **KEY WORDS: primary mesenchyme cells ingression, extracellular matrix, blastular wall, cell**

20 **morphology, gut elongation**

21 **Summary statement:** Temnopleurid embryology

22

23 **ABSTRACT**

24 Embryos of temnopleurid sea urchins exhibit species-specific morphologies. While *Temnopleurus*  
25 *toreumaticus* has a wrinkled blastula, others have a smooth blastula. Embryos of *T. toreumaticus*  
26 invaginate continuously at gastrulation, whereas in some others invagination is stepwise. We studied  
27 blastula and gastrula formation in four temnopleurids using light and scanning electron microscopy to  
28 clarify the mechanisms producing these differences. Unlike *T. toreumaticus*, blastomeres of  
29 mid-blastulae in *T. reevesii*, *T. hardwickii* and *Mespilia globulus* formed pseudopods. Before primary  
30 mesenchyme cells ingressed, embryos developed an area of orbicular cells in the vegetal plate. The cells  
31 surrounding the orbicular cells extended pseudopods toward the orbicular cell area in *T. toreumaticus*, *T.*  
32 *reevesii* and *T. hardwickii*. In *T. toreumaticus*, the extracellular matrix was well-developed and  
33 developed a hole-like structure that was not formed in others. Gastrulation of *T. reevesii*, *T. hardwickii*  
34 and *M. globulus* was stepwise, suggesting that differences of gastrulation are caused by all or some of  
35 factors: change of cell shape, rearrangement, pushing up and towing of cells. These species-specific  
36 morphologies may be caused by the shape and surface structure of blastomeres with cell-movement.

37

38

## 39 INTRODUCTION

40 Embryos of many sea urchins exhibit some species-specific morphological difference at the blastula and  
41 gastrula stages. Most indirect-developing species, which develop from a small egg with little yolk  
42 through planktotrophic larval stages, form a blastula with a smooth blastular wall, whereas  
43 direct-developing species, which develop from a large yolky egg either lack or undergo an accelerated  
44 larval stage and form a wrinkled blastula (Raff, 1987). These differences in formation are also known in  
45 other echinoderms (Henry et al., 1991).

46 Another important morphogenesis is gastrulation. After the primary mesenchyme cells (PMCs) are  
47 released into the blastocoel, the vegetal plate invaginates into the blastocoel to form the main internal  
48 structures including the archenteron (Trinkaus, 1984). There are least five steps of gastrulation in sea  
49 urchin embryos; formation of a thickened vegetal plate, primary invagination to form a gut rudiment,  
50 elongation of the gut rudiment and appearance of secondary mesenchyme cells (SMCs), secondary  
51 invagination to elongate more until reaching the internal surface of the apical plate, and tertiary  
52 invagination to recruit presumptive endodermal cells (Dan and Okazaki, 1956; Gustafson and Kinnander,  
53 1956; Kominami and Takata, 2004). The manner of invagination of the archenteron in sea urchins is into  
54 two types: stepwise or continuous invagination (Kominami and Masui, 1996). Species of the stepwise  
55 type pass the first and secondary invagination (Dan and Okazaki, 1956; Gustafson and Kinnander, 1956;  
56 Ettensohn, 1985). After basal cell adhesion at the vegetal plate becomes weak, becomes round, and the  
57 first invagination occurs (Moore and Burt, 1939; Ettensohn, 1984). The invagination is thought to occur  
58 autonomously be caused by four factors; cell growth of the ectodermal layer to cause cell migration at  
59 the vegetal side into the blastocoel, growth of cells that compose the archenteron, elongation of the  
60 archenteron by rearrangement along the vegetal-animal axis, towing of the gut rudiment by SMCs  
61 forming filopodia (Takata and Kominami, 2001; Ettensohn, 1985; Hardin, 1988; Dan and Okazaki,  
62 1956; Gustafson and Kinnander, 1956). However, secondary invagination is no caused by all four factors  
63 in all sea urchin species, resulting in species-specific variation, continuous invagination, the cells around  
64 the blastopore invaginate continuously without lag phase between the first and second invagination  
65 (Ettensohn and Ingersoll, 1992; Kominami and Masui, 1996; Takata and Kominami, 2004). Therefore,  
66 sea urchin embryos exhibit species-specific morphologies at the blastula and gastrula stages.

67 Recently, we studied development of some temnopleurid sea urchins from Japan. We found that the  
68 indirect-developing temnopleurid *Temnopleurus toreumaticus* forms a wrinkled blastula with a thick  
69 blastocoels wall, whereas other indirect-developing species *T. reevesii*, *T. hardwickii* and *Mespilia*  
70 *globulus* form smoothed blastulae with a thin blastular wall (Kitazawa et al., 2009, 2010). Embryos of *T.*  
71 *toreumaticus* invaginate continuously to form an archenteron, whereas embryos of *M. globulus* have

72 stepwise invagination (Takata and Kominami, 2004). However, gastrulation of *T. reevesii* and *T.*  
73 *hardwickii* is not fully understood, and in *T. reevesii* development until metamorphosis was described  
74 only recently (Kitazawa et al., 2014). Therefore, details of morphogenesis are still unknown.

75 In this study, we observed blastula and gastrula formation in four temnopleurids using light and  
76 scanning electron microscopes to clarify the mechanisms producing the morphological differences  
77 among temnopleurids.

78

## 79 RESULTS

### 80 Internal surface structures of embryos

81 The internal surface structures of embryos of four temnopleurids were observed by SEM until the  
82 mesenchyme blastula stage (Figs 2–5). In *T. toreumaticus*, morulae formed wrinkled blastulae after some  
83 cleavages (Fig. 2B–E) and then developed a smoothed surface again (Fig. 2F). During this period, the  
84 blastomeres had globular shape and were loosely associated with each other (Fig. 2B,E□). On the  
85 surface, there was web of fibers and granular structures of the extracellular matrix (ECM) (Fig. 2B,E’).  
86 After disappearance of the wrinkles around 6 h after fertilization, the blastomeres of the blastula started  
87 to change shape (Fig. 2F,G). At the vegetal pole, cells around the presumptive PMCs began to extend  
88 pseudopod-like structures toward the presumptive PMCs (Fig. 2G) and the ECM expanded on the  
89 internal surface except for the area of presumptive PMCs. At this stage, 17.1% of embryos developed  
90 this hole-like structure ( $n = 35$ ). After approximately 30 min, this structure became more apparent and it  
91 appeared that the ECMs around the presumptive PMCs were covering them by elongation of  
92 pseudopod-like structures of the outer cells (Fig. 2H,H□,I). The ratio of embryos with the hole-like  
93 structure was 62.5% at this stage ( $n = 48$ ) which then increased to 80.0% ( $n = 15$ ) 7 h after fertilization,  
94 and 94.1% ( $n = 17$ ) 7.5 h after fertilization. At 8.5 h after fertilization, the PMCs ingressed into the  
95 blastocoel as a mass (Fig. 2J–M).

96 In *T. reevesii* (Fig. 3) and *T. hardwickii* (Fig. 4), each blastomere of morula was adjoined closely (Figs  
97 3B, C, 4B, C). During the blastula stage, the blastomeres extended pseudopod-like structures at the  
98 vegetal (Figs 3C, 4B) and lateral sides (Fig. 3E) but the hole-like structure observed in *T. toreumaticus*  
99 was not seen (Figs 3G–I, 4C). The blastomeres of *T. hardwickii* developed many filopodia-like structures  
100 (Fig. 4B,C). At 7.5–8 h for *T. reevesii* and 9.5–10.5 h after fertilization for *T. hardwickii*, the embryos  
101 ingressed PMCs independent to each other (Figs 3I, H, 4D). At this stage in *T. reevesii*, the cells around  
102 the PMCs extended pseudopod-like structures toward the PMCs (Fig. 3I).

103 In *M. globulus* (Fig. 5), each blastomere was adjoined closely at the vegetal (Fig. 5B) and lateral sides  
104 (Fig. 5D) during the morula and blastula stages (3.5–6 h after fertilization). There were specimens not  
105 only with fewer ECMs (Fig. 5D) but also with a lot of ECM granular structures on the internal surface  
106 (Fig. 5E). At the lateral side, the blastomeres had different shape compared with those from the vegetal  
107 side and the other three species and had many intricate pseudopod-like structures (Fig. 5D,F). However,  
108 the ECMs did not develop at the internal surface of the vegetal side and there was no hole-like structure  
109 (Fig. 5G,F). At 11.5–12 h after fertilization, the PMCs started to ingress into the blastocoel separately  
110 (Fig. 5H).

111 Table 1 shows a summary of features of blastula in four temnopleurids.

112

### 113 **Manner of invagination of the archenteron**

114 The results of gastrulation in *T. toreumaticus* basically support the findings of Takata and Kominami  
115 (2004). The vegetal plate became thicker with PMCs ingression 10 h after fertilization (Fig. 2K). After 1  
116 h, the vegetal plate ingressed into the blastocoel by  $22.6 \pm 4.3\%$  of the total length of the embryo (Figs  
117 2L, 6A, B). At 12 h after fertilization, the archenteron ingressed by  $44.9 \pm 8.6\%$  and the diameter was  
118 narrower than in the previous hour (Fig. 2N). At approximately 70% of ingression, the middle part of the  
119 archenteron became narrower and the wall of the archenteron became thinner (Fig. 2O). At this stage,  
120 SMCs were identified at the tip of the archenteron. At 15 h after fertilization, the tip of the archenteron  
121 was attached to the apical plate (Fig. 2P) and the invagination ratio was  $77.1 \pm 7.4\%$  (as the ectodermal  
122 area at the apical plate was included in the total length of the embryo in this experiment, the ratio is not  
123 100%) (Fig. 6B). These results indicate that this species has continuous invagination without a lag phase.

124 In *T. reevesii*, PMCs ingressed into the blastocoel 11 h after fertilization (Fig. 3J). The vegetal plate  
125 became thicker and started to ingress slightly (Fig. 3K). At 14 h after fertilization, the archenteron  
126 ingressed until  $23.8 \pm 4.6\%$  and SMCs occurred at the tip of the archenteron (Figs 3L, 6C). The  
127 archenteron ingressed by  $38.2 \pm 3.4\%$  in 2 hours, but the ratio did not change (Fig. 6C). At 20 h after  
128 fertilization, the archenteron ingressed again until approximately 50% (Fig. 6C). The tip of the  
129 archenteron did not attach to the apical plate and invagination of the archenteron finished 23 h after  
130 fertilization (Fig. 3N). Embryos of *T. hardwickii* had similar invagination pattern of *T. reevesii* (Fig. 4).  
131 After PMC ingression 11 h after fertilization (Fig. 4D), the vegetal plate became thicker and started to  
132 invaginate slightly 13 h after fertilization (Fig. 4E). The archenteron ingressed keeping a smoothed curve  
133 shape and the PMCs started to move into the blastocoel (Fig. 4F). At 14 h after fertilization, the  
134 invagination ratio of the archenteron was  $15.9 \pm 2.6\%$  and then increased to  $36.2 \pm 2.7\%$  in 2 hours (Figs  
135 4G, 6D). Around this stage, some SMCs started to move from the tip of the archenteron into the  
136 blastocoel (Fig. 4G, H). At 17 h after fertilization, the invagination ratio was still  $39.8 \pm 2.4\%$  (Fig. 6D).  
137 Finally, the invagination finished at approximately 60% (19 h after fertilization) without attachment of  
138 the archenteron to the apical plate (Figs 4I, 6D).

139 In *M. globulus*, the PMC ingression started 11 h after fertilization (Fig. 5G–I) and then 3 h later  
140 invagination of the archenteron began ( $14.4 \pm 2.8\%$ ) (Figs 5J, 6E). In most developing specimens, the  
141 archenteron ingressed by  $20.6 \pm 3.9\%$  15 h after fertilization (Fig. 6E) with SMCs at the tip (Fig. 5K).  
142 One hour later, the invagination ratio increased to  $27.0 \pm 5.2\%$  (Fig. 6E) and some SMCs formed  
143 filopodia and started to move into the blastocoel (Fig. 5L). After passing the lag phase 16–17 h after  
144 fertilization (Figs 5M, 6E), the archenteron elongated suddenly and then finished invagination at 19 h

145 after fertilization ( $48.4 \pm 4.1\%$ ) (Figs 5N, 6E).

146

### 147 **Morphological changes of the archenteron**

148 In our study of temnopleurid gastrulation, each region of an embryo was measured (Fig. 1). At first, the  
149 diameter of the blastopore for the total width of the embryo was measured (Fig. 7). In *T. toreumaticus*,  
150 the ratio was  $33.5 \pm 9.0\%$  at initiation of invagination until just before the finish of invagination and then  
151 decreased to  $9.3 \pm 6.5\%$  18 h after fertilization (Fig. 7B). The diameter did not change in *T. reevesii*  
152 during invagination (approximately 30%, Fig. 7C). In *T. hardwickii*, the diameter of the blastopore was  
153 constant until the end of first invagination ( $31.5 \pm 5.7\%$ ) but then decreased after the second  
154 invagination started ( $25.7 \pm 4.3\%$ ) (Fig. 7D). In *M. globulus*, the diameter was constant until the end of  
155 the lag phase ( $29.4 \pm 4.0\%$  17 h after fertilization). However, it decreased after the initiation of the  
156 secondary invagination ( $23.4 \pm 4.3\%$ ) (Fig. 7E).

157 Next, the archenteron diameter was measured at the middle part (Figs 1, 8A). In *T. toreumaticus*, the  
158 archenteron diameter had decreased 2–3 h after initiation of invagination ( $28.5 \pm 5.0$  to  $18.9 \pm 2.4 \mu\text{m}$ )  
159 and did not change thereafter (Fig. 8B). To determine whether this decrease was caused by a decrease in  
160 thickness of the cells at the archenteron wall, the thickness of the archenteron wall was calculated (Fig.  
161 8A). During invagination, the thickness of the archenteron wall was  $8.7 \pm 2.7 \mu\text{m}$  until 2 h after initiation  
162 of invagination and then decreased to  $5.8 \pm 1.8 \mu\text{m}$  1 h later (Fig. 8C). Therefore, the decrease in  
163 thickness of the archenteron wall at both sides was approximately  $6 \mu\text{m}$  and this decrease may have  
164 caused a decrease in the diameter of the archenteron. In *T. reevesii*, the diameter of the archenteron  
165 decreased as secondary invagination progressed (from  $25.2 \pm 4.5 \mu\text{m}$  14–18 h after fertilization to  $16.9 \pm$   
166  $2.7 \mu\text{m}$  23 h after fertilization) (Fig. 8D). The thickness of the archenteron wall was  $5.3 \pm 2.4$ – $6.0 \pm 1.9$   
167  $\mu\text{m}$  until just after the initiation of the secondary invagination but it decreased as secondary invagination  
168 progressed (Fig. 8E). This means that the decrease in diameter of the archenteron is caused solely by  
169 decrease in thickness of the archenteron wall. In *T. hardwickii*, it was difficult to identify each area  
170 before the end of the first invagination (Fig. 4G). At this stage, the diameter of the archenteron was  $19.7$   
171  $\pm 1.7 \mu\text{m}$  and then slightly decreased to  $17.1 \pm 1.8 \mu\text{m}$  just after the initiation of the secondary  
172 invagination (Fig. 8F). In this species, the thickness of the archenteron wall did not change during  
173 invagination (Fig. 8G). In *M. globulus*, it was difficult to identify each area before the lag phase and the  
174 diameter of the archenteron was  $31.7 \pm 4.5 \mu\text{m}$  (Fig. 8H). From the initiation of the secondary  
175 invagination, it decreased to a constant diameter of  $23.6 \pm 3.3 \mu\text{m}$ . The thickness of the archenteron wall  
176 was  $8.5 \pm 1.8 \mu\text{m}$  at 17 h after fertilization, and then decreased to  $6.3 \pm 1.4 \mu\text{m}$  1 hour later (Fig. 8I).  
177 This means that the decrease in the diameter of the archenteron is caused not by a decrease in the

178 thickness of the archenteron wall only.

179 In *T. toreumaticus*, the outer and inner diameters of the archenteron on the tip were constant during  
180 invagination of the archenteron (Fig. 9B,C). In *T. reevesii*, the outer and inner diameters were  $27.5 \pm 4.8$   
181 and  $19.1 \pm 6.2 \mu\text{m}$ , respectively, just after the start of the first invagination, but decreased 1 h later (Fig.  
182 9D,E). The diameters stayed constant until secondary invagination and then increased to  $33.5 \pm 5.7$  and  
183  $21.3 \pm 4.4 \mu\text{m}$  23 h after fertilization. In *T. hardwickii*, the outer and inner diameters were  $23.7 \pm 3.3$  and  
184  $12.7 \pm 3.3 \mu\text{m}$  respectively at the start of secondary invagination and then increased to  $28.7 \pm 3.6$  and  
185  $14.5 \pm 3.8 \mu\text{m}$  (19 h after fertilization) (Fig. 9F,G). However, the diameters decreased. In *M. globulus*,  
186 the outer and inner diameters decreased as invagination progressed [ $33.9 \pm 5.9$  and  $21.3 \pm 4.8 \mu\text{m}$ ,  
187 respectively, at the initiation of invagination (Fig. 9H);  $27.3 \pm 3.7$  and  $11.8 \pm 3.3 \mu\text{m}$  at the end of the  
188 invagination (Fig. 9I)].

189 The ratio of the internal archenteron length without the wall of the tip for the total length of the  
190 embryo was as the invagination ratio of the internal archenteron. In *T. toreumaticus*, *T. hardwickii* and *M.*  
191 *globulus*, this ratio became higher as invagination progressed, while in *T. reevesii*, this ratio was very  
192 similar to the ratio of invagination of the archenteron at 2 h after initiation of invagination ( $25.4 \pm 3.6\%$   
193 and  $26.7 \pm 5.1\%$ ) ( $31.3 \pm 8.8\%$  and  $44.9 \pm 8.6\%$  12 h after fertilization in *T. toreumaticus*;  $11.1 \pm 3.9\%$   
194 and  $21.3 \pm 2.4\%$  16 h after fertilization in *T. hardwickii*;  $12.0 \pm 4.8\%$  and  $20.6 \pm 3.9\%$  16 h after  
195 fertilization in *M. globulus*). The difference between the invagination ratio of the internal archenteron  
196 length and the archenteron length off the whole embryonic length was always about  $8.0 \pm 2.0\%$  3 h after  
197 the initiation of invagination.

198

### 199 **Timing of appearance and filopodia formation of SMCs**

200 The SMCs in four temnopleurids appeared approximately 3 h after initiation of invagination (Fig. 6;  
201 70.0% of *T. toreumaticus*, 65.0% of *T. reevesii*, 80.0% of *T. hardwickii* and *M. globulus*). After this stage,  
202 a part of the SMCs formed filopodia and the number of specimens with SMCs with one or more  
203 filopodia was counted. In *T. toreumaticus*, 65.0% of specimens had SMCs with filopodia before 1 h at  
204 the end of invagination (Fig. 6). Embryos of the three other species (*T. reevesii*, *T. hardwickii* and *M.*  
205 *globulus*) with stepwise invagination had SMCs with filopodia during the secondary invagination (Figs  
206 2□6) [ $85.0\%$  in *T. reevesii* 8 h after initiation of invagination (21 h after fertilization);  $75.0\%$  of *T.*  
207 *hardwickii* 4 h after initiation of invagination (18 h after fertilization);  $70.0\%$  in *M. globulus* 5 h after  
208 initiation of invagination (18 h after fertilization)].

209



## 210 DISCUSSION

211 In this study, structures of the blastulae and gastrulae indicated species-specific features among four  
212 temnopleurids (Figs 2–5). The shape and position (vegetal or lateral) of blastomeres in blastulae differed  
213 among species. The loosely adjacent blastomeres on the blastular wall of *T. toreumaticus* had a globular  
214 shape until the wrinkled blastula stage (Fig. 2). In *T. toreumaticus* the cell number at hatching is only  
215 500, whereas in other species it is 600–800 (Masuda, 1979). As the diameter of the blastulae is similar  
216 among these species (Kitazawa et al., 2010), we suggest that fewer cleavages cause the difference in the  
217 cell shape and adhesion among blastomeres at the same developmental stage.

218 The blastulae of the temnopleurids studied have blastomeres with different kinds of pseudopod-like  
219 structures (Figs 2–5). In *T. toreumaticus*, the blastomeres around the presumptive PMCs extended  
220 pseudopods to them (Fig. 2G,H). Immers (1961) indicated that in sea urchins the formation of filopodial  
221 projections of mesenchyme cells is supported by a matrix of sulfated polysaccharides combined with  
222 proteins. The differences in the shape of the pseudopod-like structures among temnopleurids may be  
223 caused by different substances within the matrix. Recently, Yaguchi et al. (2015) indicated that adhesion  
224 between blastomeres at the early cleavages was very loose, and that the blastomeres had many  
225 protrusions attached to the outer ECM and the hyaline layer at the cleavage furrow in *T. reevesii*. Also, it  
226 was difficult to divide each blastomere of the early cleavage-staged embryos of *T. hardwickii* and *M.*  
227 *globulus* because of the outer ECM and the hyaline layer (data not shown). However, in our observations  
228 of blastulae, the space between blastomeres became narrow and connected by complex pseudopod-like  
229 structures (Fig. 3). The blastomeres around the presumptive PMCs seemed to form layers by elongated  
230 pseudopod-like structures (Fig. 3I). These phenomena indicate that adhesion between blastomeres  
231 changes from loose to tight. Future work should analyze whether the early protrusions form the  
232 pseudopod-like structures at the blastula stage.

233 The distribution of the ECMs was different among species and position (vegetal or lateral). The  
234 blastocoelic surface develops many kind of ECMs that include mucopolysaccharides (Okazaki and  
235 Nijjima, 1964), glycoproteins fibronectin, and laminin (Spiegel et al., 1983; Benson et al., 1999), and  
236 collagen (Kefalides et al., 1979; Crise-Benson and Benson, 1979). Furthermore, in the basal lamina  
237 distribution of fibronectin and laminin differ among species (Spiegel et al., 1983; Katow et al., 1982).  
238 The blastocoelic surface of the vegetal plate of *T. toreumaticus* had was a hole-like structure in the ECM  
239 (Fig. 2G,H). This was absent in the other species (Figs 3–5). In *Lytechinus variegatus*, the blastocoelic  
240 surfaces were covered with a thin basal lamina composed of fibrous- and non-fibrous materials before  
241 PMC ingression and then a web-like ECM became located at the animal hemisphere (Galileo and Morrill,  
242 1985). Galileo and Morrill (1985) found that the blastoemeres, before hatching on the blastocoel wall,

243 were intertwined and had patchy meshwork of ECM. They were connected by thin cellular processes to  
244 each other perpendicular to the animal-vegetal axis. In addition, the blastocoel wall around the animal  
245 hemisphere developed a hole without ECM. Recently it was reported that the presumptive PMCs lose  
246 laminin distribution related with the gene regulatory network sub-circuit for basal lamina remodeling  
247 that include *tbr*, *dri* and *hex* by knockdown of these genes (Saunders and McClay, 2014). Therefore, we  
248 suggest that the hole-like structure observed in *T. toreumaticus* may be formed of laminin added by these  
249 genes, and that embryos of the temnopleurids in our study may have different amount and distribution of  
250 laminin. Examination of the photographs published by Amemiya (1989) of *Hemicentrotus pulcherrimus*  
251 and *Pseudocentrotus depressus* revealed that the blastomeres of the animal side elongate to the vegetal  
252 pole. However, the embryos did not form a vegetal hole in the ECM. Furthermore, Amemiya (1989)  
253 reported that PMC patterning is caused by accumulation of fibrils of the basal lamina. This report  
254 supports our findings that the ECM hole of *T. toreumaticus* may attach PMCs at the vegetal plate. The  
255 fixative used in our study was very similar to method lacking calcium ions in Amemiya (1989).  
256 Therefore, our results may indicate that there are differences in the distribution of a calcium-dependent  
257 ECM among species and that *T. toreumaticus* has a lot of calcium-dependent ECM or  
258 calcium-independent ECM.

259 In *M. globulus*, each blastomere of the blastula became located close to the surface along with  
260 filament structures around the 8th cleavage. A sheet-like structure of mucopolysaccharides on the  
261 blastocoelic surface was identified for movement of SMCs on these structures (Endo and Uno, 1960). In  
262 our study, we did not identify well developed filamentous structures in blastulae of *M. globulus* but  
263 observed some ECMs on the blastocoelic surface (Fig. 5E). Endo (1966) reported that in *Mespilia* when  
264 the PMCs ingress, they dispose of their apical cytoplasm while still attached by desmosomes to  
265 neighboring cells. On the other hand, in *Arbacia* (Gibbins et al., 1969) and *Lytechinus pictus* (Katow and  
266 Solorsh, 1980), the desmosomes disappear from the PMCs. Therefore, analysis of the ultrastructure of  
267 the blastular wall among these temnopleurids is needed in the future.

268 The ECMs is important for cell movement, such as PMC migration for PMC differentiation,  
269 modulation of epithelial cell polarity, and gastrulation (Solorsh and Lane, 1988; Katow et al., 1982; Fink  
270 and McClay, 1985; Amemiya, 1989; Adelson and Humphreys, 1988; Ingersoll and Ettensohn, 1994;  
271 Berg et al., 1996). In *L. pictus*, PMCs have six types of cell processes, depending on a specific  
272 component of the basal lamina substratum, that are involved in cell migratory behavior (Katow and  
273 Solorsh, 1981). In our study, the PMCs of *T. reevesii*, *T. hardwickii* and *M. globulus* ingressed separately.  
274 We suggest that in *T. toreumaticus*, PMC ingression en masse may be caused by inner ECM distribution  
275 at the vegetal plate. We also observed some kind of process structures (Figs 2–5) and suggest that these

276 structures may cause cell movement.

277 Gastrulation in *T. reevesii*, and *T. hardwickii* and *M. globulus* is by stepwise invagination with a lag  
278 period (Figs 3–6). This means that that the mechanisms of gastrulation in these temnopleurids may be  
279 different to that of *T. toreumaticus* with continuous invagination. Although timing of the initiation of  
280 invagination in *T. toreumaticus* and *M. globulus* in our study was different from that reported by Takata  
281 and Kominami (2004), it suggests that differences between batches of embryos or geographic location  
282 [Yamaguchi area in the present study; Kouchi and Ehime areas in Takata and Kominami (2004)] of the  
283 same species may cause different developmental speeds of embryos.

284 The mechanisms of invagination of the archenteron of each species were considered according to four  
285 factors: pushing of the vegetal cells into the blastocoel by cell growth at the animal pole (Takata and  
286 Kominami, 2001), elongation of the cells forming the archenteron, re-arrangement of the cells forming  
287 the archenteron along the animal-vegetal axis and toughening of the gut rudiment by the filopodia of the  
288 SMCs ingressed into the blastocoel from the tip of the archenteron (Ettenshon, 1985; Hardin, 1988; Dan  
289 and Okazaki, 1956; Gustafson and Kinnander, 1956). In *T. toreumaticus*, the blastopore became narrow  
290 at the end of invagination (Fig. 7B). The blastopore of *Scaphechinus milabilis*, which has continuous  
291 invagination becomes narrow around the end of invagination (Kominami and Masui, 1996). Therefore,  
292 we suggest that the archenteron of *T. toreumaticus* may also elongate by continuous ingression of the  
293 cells around the blastopore into the blastocoel. In irregular sea urchins with continuous invagination, the  
294 diameter of the archenteron during invagination does not change so that the cell rearrangement does not  
295 affect elongation of the archenteron (Kominami and Masui, 1996; Takata and Kominami, 2004).  
296 However, we observed that in *T. toreumaticus* the diameter at the mid archenteron and the thickness of  
297 the archenteron wall decreased rapidly. There is a possibility that the rearrangement and elongation of  
298 the archenteron cells causes elongation of the archenteron. In *T. toreumaticus* and irregular sea urchins,  
299 the early developmental events including PMCs ingression, initiation of the invagination of the  
300 archenteron, and formation of the SMCs, start and finish at relatively early stages. This suggests that  
301 developmental events may be accelerated and omitted overall, and then involved the continuous  
302 invagination of the archenteron. In this species the SMCs and elongated filopodia formed near the end of  
303 invagination, which means that the SMCs may not toughen the archenteron. The final degree of  
304 invagination is about 94% (Fig. 6B) and the primary pore canals of this species do not maintain the body  
305 width (Kitazawa et al., 2014). We suggest that the continuous invagination occurs by elongation of the  
306 archenteron itself.

307 In *T. reevesii*, the thickness of the archenteron wall decreased after the lag period (Fig. 6C). This  
308 suggests that cell elongation causes elongation of the archenteron. The diameter and thickness of the

309 archenteron wall at the mid archenteron decreased. This suggests that another decrease was caused by  
310 rearrangement of the cells in the archenteron (Fig. 8D,E). It is a possible that the SMCs cause elongation  
311 of the archenteron because of the long lag period and period for secondary invagination in this species  
312 (Fig. 6C), and SMCs formed filopodia during secondary invagination. After initiation of the invagination,  
313 the thickness of the archenteron tip became thin temporally in only this species (data not shown).

314 In *T. hardwickii*, the diameter of the blastopore decreased from the end of the first invagination to the  
315 initiation of the secondary invagination (Fig. 6D). As *S. milabilis* (Kominami and Masui, 1996), results  
316 suggest that this decrease of *T. hardwickii* may be caused by growth at the animal pole pushing the cells  
317 at the vegetal pole causing elongation the archenteron. The diameter at the mid archenteron decreased  
318 during the lag period (Fig. 8F), caused by rearrangement of the cells of the archenteron along the  
319 animal-vegetal axis. The thickness of the archenteron wall was constant (Fig. 8G) and it may mean that  
320 elongation of the archenteron is caused not by cell elongation, but by rearrangement of the cells. SMCs  
321 with filopodia were observed during secondary invagination, and it is possible that the SMCs cause  
322 elongation of the archenteron. However, invagination in *T. hardwickii* finished at about 60% of the  
323 whole embryonic length and SMCs were only identified near the end of the invagination. Therefore, it is  
324 possible that the SMCs with filopodia do not cause elongation of the archenteron but toughen the tip of  
325 the archenteron at the presumptive oral region.

326 In *M. globulus*, the cells of the archenteron became thin from the end of the lag period to the initiation  
327 of the secondary invagination (Fig. 8H,I). Takata and Kominami (2004) reported that in *M. globulus* the  
328 rearrangement was not remarkable. The tip of the archenteron did not attach to the apical plate, nor did  
329 SMCs disperse into the blastocoel. Furthermore, the cell number of the archenteron did not change.  
330 Therefore, it is suggested that elongation of the cells to form the archenteron causes elongation of the  
331 archenteron. The diameter of the blastopore decreased during invagination (Fig. 7E) which means that  
332 the push of the vegetal cells by growth of the animal cells may cause elongation of the archenteron in  
333 this species.

334 Formation of SMCs occurred at the same time in the four temnopleurids studied. However, the three  
335 species with stepwise invagination needed a longer invagination period than the species with continuous  
336 invagination and their final invagination ratio was approximately 60% (Fig. 6). Their SMCs formed  
337 filopodia during the late invagination period (Fig. 6) and it is possible that the SMCs change the  
338 direction of elongation of the archenteron to the presumptive oral region by toughing the tip of the  
339 archenteron. In addition, Amemiya et al. (1982) reported that the pseudopodia from the SMCs may pull  
340 up the archenteron in *H. pulcherrimus* and *P. depressus* but not in *A. crassispina* because it does not  
341 form many pseudopodia.

342 The diameters at the tip of the archenteron indicate different changes among species (Fig. 9). These  
343 results indicate that the feature at the tip of the archenteron may cause species-specific invagination or  
344 the formational process of the coelomic pouches. This conclusion is supported by findings that the  
345 pattern of formation of the primary pore canal from the coelomic pouches is different among these  
346 species (Kitazawa et al., 2012, 2014).

347 Our results indicate that temnopleurids have species-specific differences during early morphogenesis,  
348 including blastula formation and invagination of the archenteron including effective factors in the same  
349 family (Table 1, Fig. 10). *Temnopleurus toreumaticus* develops some species-specific features like  
350 wrinkled egg and wrinkled blastula formation at the early developmental stages (Kitazawa et al., 2009,  
351 2010). Phylogenetic analysis based on allozyme data of temnopleurids suggest that *T. toreumaticus* and *T.*  
352 *reevesii* are more closely related than *T. hardwickii* and *M. globulus* (Matsuoka and Inamori, 1996).  
353 However, based on morphological and molecular analysis, Jefferies et al. (2003) determined that *M.*  
354 *globulus* and *T. reevesii* are more closely related to each other than to *T. toreumaticus*. Recently, we also  
355 observed development of another temnopleurid, *Temnotrema sculptum* and this species is very similar to  
356 *T. reevesii*, *T. hardwickii* and *M. globulus*, but not *T. toreumaticus* (Fujii et al., 2015). Therefore, we  
357 hypothesize that after divergence, *T. toreumaticus* evolved more species-specificities at early  
358 developmental stages than other temnopleurids.

359

360 **MATERIALS AND METHODS**

361 **Spawning and embryonic culture**

362 Adult *Temnopleurus toreumaticus*, *T. reevesii*, *T. hardwickii* and *Mespilia globulus* were collected from  
363 the Inland Sea (Setonai), Yamaguchi Prefecture, Japan. They were induced to spawn by injection of a  
364 small amount of 0.5 M KCl solution into the body cavities from June to December for *T. toreumaticus*,  
365 June to October for *T. reevesii*, April to November for *T. hardwickii*, and August to December for *M.*  
366 *globulus*. The eggs were washed with filtered sea water (FSW) and then fertilized. The fertilized eggs  
367 were transferred into a glass dish filled with artificial sea water (ASW; TetraMarin® Salt Pro, Tetra,  
368 Melle, Germany) and cultured at 24°C. The embryos were observed under a microscope (OPTIPHOT-2,  
369 Nikon, Tokyo, Japan) and photographed using digital cameras (FinePix F710, Fujifilm, Tokyo, Japan;  
370 F200EXR, Fujifilm;  $\mu$ 810, Olympus, Tokyo, Japan).

371

372 **Fixation and observation of embryos**

373 For SEM observation, embryos were fixed, dehydrated and mounted on aluminum stubs using  
374 double-sided conductive aluminum tape according to Kitazawa et al. (2012). After dividing the embryos  
375 with a hand-held glass needle, the specimens were coated with gold using a fine ion sputter coater  
376 (E-1010, Hitachi High-Technologies, Tokyo, Japan), observed and photographed under a scanning  
377 electron microscope (Miniscope TM-1000S, Hitachi).

378 For observation of gastrulation, after 10 h after fertilization embryos were fixed in 4% formalin ASW  
379 for approximately 45 min every hour. Fixed embryos were exchanged gradually from 70% ethanol to  
380 ion-exchanged water in a 96-well plastic plate coated with 1% BSA ASW. They were washed in PBS  
381 (1.2 g Tris, 6 g NaCl, 0.2 g KCl/l, pH 7.4) several times, 35% glycerol solution was added, and then  
382 observed as described above. Twenty embryos were measured using a micrometer each hour from one  
383 batch of *T. toreumaticus*, two batches of *T. reevesii* and *M. globulus*, and four batches of *T. hardwickii*  
384 according to Kominami and Masui (1996) (Fig. 1). Each embryo's total length and width was measured,  
385 the total length of the archenteron, the diameter of the blastopore of the archenteron, the outer or inner  
386 diameter of the archenteron at the middle part of the total length of the archenteron and the outer or inner  
387 diameter of the archenteron on the tip (In *T. hardwickii*, embryos 7 h after initiation of invagination were  
388 not measured).

389

390 **Acknowledgements.** We appreciate the Department of Fishery in Yamaguchi Prefecture and Yamaguchi  
391 Fisheries Cooperative Association for permission to collect sea urchins.

392

393 **Competing interests**

394 The authors declare no competing or financial interests.

395

396 **Author contributions**

397 C. K. and A. Y. designed and T. F. and Y. E. performed the experiments equally. C. K. and A. Y. wrote  
398 the manuscript by discussion with M. K.

399

400 **Funding**

401 This work was financially supported in part by Yamaguchi University Foundation to C. K.

402

403 **References**

- 404 **Adelson, D. L. and Humphreys, T.** (1988). Sea urchin morphogenesis and cell-hyaline adhesion are  
405 perturbed by a monoclonal antibody specific for hyaline. *Development* **104**, 391-402.
- 406 **Amemiya, S.** (1989). Development of the basal lamina and its role in migration and pattern formation of  
407 primary mesenchyme cells in sea urchin embryos. *Develop. Growth Differ.* **31**, 131-145.
- 408 **Amemiya, S., Akasaka, L. and Terayama, H.** (1982). Scanning electron microscopical observations on  
409 the early morphogenetic processes in developing sea urchin embryos. *Cell Differ.* **11**, 291-293.
- 410 **Benson, S., Page, L., Ingersoll, E., Rosenthal, E., Dungca, K. and Signor, D.** (1999). Developmental  
411 characterization of the gene for laminin  $\alpha$ -chain in sea urchin embryos. *Mech. Dev.* **81**, 37-49.
- 412 **Berg, L. K., Chen, S. W. and Wessel, G. M.** (1996). An extracellular matrix molecule that is selectively  
413 expressed during development is important for gastrulation in the sea urchin embryo. *Development*  
414 **122**, 703-713.
- 415 **Crise-Benson, N. and Benson, S. C.** (1979). Ultrastructure of collagen in sea urchin embryos. *Wilhelm*  
416 *Roux's Archives.* **186**, 65-70.
- 417 **Dan, K. and Okazaki, K.** (1956). Cyto-embryological studies of sea urchins. III. Role of the secondary  
418 mesenchyme cells in the formation of the primitive gut in sea urchin larvae. *Biol. Bull.* **110**, 29-42.
- 419 **Endo, Y. and Uno, N.** (1960). Intercellular bridges in sea urchin blastula. *Zool. Mag.* **69**, 8. (in  
420 Japanese)
- 421 **Ettensohn, C. A.** (1984). Primary invagination of the vegetal plate during sea urchin gastrulation. *Am.*  
422 *Zool.* **24**, 571-588.
- 423 **Ettensohn, C. A.** (1985). Gastrulation in the sea urchin embryos is accompanied by the rearrangement  
424 of invaginating epithelial cells. *Dev. Biol.* **112**, 383-390.
- 425 **Ettensohn, C. A. and Ingersoll, E. P.** (1992). *7 Morphogenesis of the sea urchin embryo.* In  
426 *Morphogenesis: An Analysis of the Development of Biological Form* (ed. E. Rossomando and S.  
427 Alexander), pp. 189-262. New York: Marcel Dekker Inc.
- 428 **Fink, R. and McClay, D.** (1985). Three cell recognition changes accompany the ingression of sea  
429 urchin primary mesenchyme cells. *Dev. Biol.* **107**, 66-74.
- 430 **Fujii, T., Doi, A., Hiratoko, N., Yamanaka, A. and Kitazawa, C.** (2015). Development of *Temnotrema*  
431 *sculptum*. *Pro. Seventh Int. Con. Information*, 21-24.
- 432 **Galileo, D. S. and Morrill, J. B.** (1985). Patterns of cells and extracellular material of the sea urchin  
433 *Lytechinus variegatus* (Echinodermata; Echinoidea) embryo, from hatched blastula to late gastrula. *J.*  
434 *Morp.* **185**, 387-402.
- 435 **Gibbins, J. R., Tilney, L. G. and Porter, K. R.** (1969). Microtubules in the formation and development



- 436 of the primary mesenchyme in *Arbacia punctulata*. *J. Cell Biol.* **41**, 201-226.
- 437 **Gustafson, T. and Kinnander, H.** (1956). Microaquaria for time-lapse cinematographic studies of  
438 morphogenesis in swimming larvae and observations on sea urchin gastrulation. *Exp. Cell Res.* **11**,  
439 36-51.
- 440 **Hardin, J.** (1988). The role of secondary mesenchyme cells during sea urchin gastrulation studied by  
441 laser ablation. *Development* **103**, 317-324.
- 442 **Henry, J. J., Wray, G. A. and Raff, R. A.** (1991). Mechanism of an alternate type of echinoderm  
443 blastula formation: the wrinkled blastula of the sea urchin *Heliocidaris erythrogramma*. *Develop.*  
444 *Growth Differ.* **33**, 317-328.
- 445 **Immers, J.** (1961). Comparative study of the localization of incorporated <sup>14</sup>C-labeled amino acids and  
446 <sup>35</sup>SO<sub>4</sub> in the sea urchin ovary, egg and embryo. *Exp. Cell Res.* **24**, 356-378.
- 447 **Ingersoll, E. P. and Etensohn, C. A.** (1994). An N-linked carbohydrate-containing extracellular matrix  
448 determinant plays a key role in sea urchin gastrulation. *Dev. Biol.* **163**, 351-366.
- 449 **Jefferies, C., Emlet, R. B. and Littlewood, D. T. J.** (2003). Phylogeny and evolution of developmental  
450 mode in temnopleurid echinoids. *Mol. Phyl. Evol.* **28**, 99-118.
- 451 **Katow, H. and Solursh, M.** (1981). Ultrastructural and time-lapse studies of primary mesenchyme cell  
452 behavior in normal and sulfate-deprived sea urchin embryos. *Exp. Cell Res.* **136**, 233-245.
- 453 **Katow, H., Yamada, K. M. and Solursh, M.** (1982). Occurrence of fibronectin on the primary  
454 mesenchyme cell surface during migration in the sea urchin embryo. *Differentiation* **22**: 120-124.
- 455 **Katow, H. and Solursh, M.** (1980). Ultrastructure of primary mesenchyme cell ingression in the sea  
456 urchin *Lytechinus pictus*. *J. Exp. Zool.* **213**, 231-246.
- 457 **Kefalides, N. A., Alper, R. and Clark, C. C.** (1979). Biochemistry and metabolism of basement  
458 membranes. *Int. Rev. Cytol.* **61**, 167-228.
- 459 **Kitazawa, C., Nishimura, H., Yamaguchi, T., Nakano, M. and Yamanaka, A.** (2009). Novel  
460 morphological traits in the early developmental stages of *Temnopleurus toreumaticus*. *Biol. Bull.* **217**,  
461 215-221.
- 462 **Kitazawa, C., Tsuchihashi, Y., Egusa, Y., Genda, T. and Yamanaka, A.** (2010). Morphogenesis during  
463 early development Temnopleuridae sea urchins. *Information* **13(3B)**, 1075-1089.
- 464 **Kitazawa, C., Kobayashi, C., Kasahara, M., Takuwa, Y. and Yamanaka, A.** (2012). Morphogenesis  
465 of adult traits during the early development of *Mespilia globulus* Linnaeus, 1758 (Echinodermata:  
466 Echinoidea). *Zool. Stud.* **51(8)**, 1481-1489.
- 467 **Kitazawa, C., Skaguchi, C., Nishimura, H., Kobayashi, C., Baba, T. and Yamanaka, A.** (2014).  
468 Development of the sea urchins *Temnopleurus toreumaticus* Leske, 1778 and *Temnopleurus reevesii*

- 469 Gray, 1855 (Camarodonta: Temnopleuridae). *Zool. Stud.* **53**, 3.
- 470 **Kominami, T. and Masui, M.** (1996). A cyto-embryological study of gastrulation in the sand dollar,  
471 *Scaphechinus mirabilis*. *Dev. Growth Differ.* **38**, 129-139.
- 472 **Kominami, T. and Takata, H.** (2004). Gastrulation in the sea urchin embryo: a model system for  
473 analyzing the morphogenesis of a monolayered epithelium. *Dev. Growth Differ.* **46**, 309-326.
- 474 **Masuda, M.** (1979). Species specie pattern of ciliogenesis in developing sea urchin embryos. *Develop.*  
475 *Growth Differ.* **21**, 545-552.
- 476 **Matsuoka, N. and Inamori, M.** (1996). Phylogenetic relationships of echinoids of the family  
477 Temnopleuridae inferred from allozyme variation. *Genes Genet. Syst.* **71**, 203-209.
- 478 **McCarthy, R. A. and Burger, M. M.** (1987). In vivo embryonic expression of laminin and its  
479 involvement in cell shape change in the sea urchin *Sphaerechinus granularis*. *Development* **101**,  
480 659-671.
- 481 **Moore, A. R. and Burt, A. S.** (1939). On the locus and nature of the forces causing gastrulation in the  
482 embryos of *Dendraster excentricus*. *J. Exp. Zool.* **82**, 159-171.
- 483 **Okazaki, K. and Niijima, L.** (1964). "Basement membrane" in sea urchin larvae. *Embryologia* **8**,  
484 89-100.
- 485 **Raff, R. A.** (1987). Constraint, flexibility, and phylogenetic history in the evolution of direct  
486 development in sea urchin. *Dev. Biol.* **119**, 6-19.
- 487 **Saunders, L. R. and McClay, D. R.** (2014). Sub-circuits of a gene regulatory network control a  
488 developmental epithelial-mesenchymal transition. *Development* **141**, 1503-1513.
- 489 **Solursh, M. and Lane, M. C.** (1988). Extracellular matrix triggers a directed cell migratory response in  
490 sea urchin primary mesenchyme cells. *Dev. Biol.* **130**, 397-401.
- 491 **Spiegel, E., Burger, M. M. and Spiegel, M.** (1983). Fibronectin and laminin in the extracellular matrix  
492 and basement membrane of sea urchin embryos. *Exp. Cell Res.* **144**, 47-55.
- 493 **Takata, H. and Kominami, T.** (2001). Ectoderm exerts the driving force for gastrulation in the sand  
494 dollar *Schaphechinus mirabilis*. *Develop. Growth Differ.* **43**, 265-274.
- 495 **Takata, H. and Kominami, T.** (2004). Behavior of pigment cells closely correlates the manner of  
496 gastrulation in sea urchin embryos. *Zool. Sci.* **21**, 1025-1035.
- 497 **Trinkaus, J. P.** (1984). *Cell into Organs: The Forces That Shape the Embryo*, 2<sup>nd</sup> ed. New Jersey:  
498 Englewood Cliffs Prentice-Hall.
- 499 **Yaguchi, S., Yamazaki, A., Wada, W., Tsuchiya, Y., Sato, T., Shinagawa, H., Yamada, Y. and**  
500 **Yaguchi, J.** (2015). Early development and neurogenesis of *Temnopleurus reevesii*. *Develop. Growth*  
501 *Differ.* **57**, 242-250.
- 502

503 **Figure legends**

504 **Fig. 1.** Measurement of gastrulae. Each part of the gastrula was measured; the total length of the embryo  
505 (A) or the archenteron (B), the total width of the embryo (C), the diameter of the blastopore (D), the  
506 outer or inner diameter of the archenteron at the middle part of the total length of the archenteron (E or  
507 E') or at the tip (F or F').

508

509 **Fig. 2.** Embryonic development of *T. toreumaticus*. Embryos observed by light (C, D, F, K, L, N–P) or  
510 SEM (B, E, E', G–J, M). **A.** Schematic diagrams of a morula (upper) and blastula (bottom), lateral view.  
511 The area inside the black boxes was focused on using SEM. **B.** The internal surface at the vegetal pole of  
512 an embryo 3.5 h after fertilization. **C.** A morula 4 h after fertilization. **D, E.** Blastulae 4.5 h after  
513 fertilization. The embryos had developed wrinkles (D; arrowheads). Blastomeres were still orbicular in  
514 shape (E, E') [E': higher magnification of area inside white box in (E)]. **F, G.** Blastulae 6 h after  
515 fertilization. The wrinkles had disappeared (F). At the vegetal pole (G), micromeres-descendants had  
516 kept their orbicular shape, but the cells around them had started to produce pseudopod-like structures  
517 [insert; higher magnification of the area inside the white box in (G)]. **H.** An embryo 6.5 h after  
518 fertilization. As shown in the insert, which show a higher magnification of the area inside the white box,  
519 orbicular cells were surrounded by cells that extended pseudopod-like structures toward these cells and  
520 there was a ring of ECM at the vegetal pole that seemed to form a hole-like structure. (H') shows a  
521 schematic diagram of the inside of the vegetal plate [center: presumptive PMCs, outer: cells with  
522 pseudopod-like structures, blue lines: ECM]. **I.** A hatching blastula 7 h after fertilization. **J.** An embryo  
523 8.5 h after fertilization. PMCs migrated into the blastocoel as a mass (white dashed circle). **K–M.**  
524 Embryos at 10 h (K), 11 h (L) or 11.5 h (M) after fertilization [dorso-ventral (K, L, N–P) or animal  
525 views (M)]. After migration, PMCs moved into a narrow blastocoel at the vegetal side. **N–P.** Gastrulae  
526 12.5 h (N), 13 h (O) or 15 h (P) after fertilization. The archenteron with the flat tip elongated toward the  
527 apical plate and then formed SMCs (N). The middle part of archenteron was narrower (O) and finally the  
528 tip attached to the apical plate (P). At this stage, there were some SMCs with filopodia (arrow). Scale  
529 bars B, E, G–J, M=20  $\mu\text{m}$ ; C, D, F, K, L, N–P=50  $\mu\text{m}$ .

530

531 **Fig. 3.** Embryonic development of *T. reevesii*. Embryos observed by light (B, D, F, H, J–M) or SEM (C,  
532 E, G, I). **A.** Schematic diagrams of a morula (upper) and blastula (bottom), lateral view. The area inside  
533 the black boxes was studied by SEM. **B, C.** Morulae 3.5 h after fertilization. On the internal surface at  
534 the vegetal pole, blastomeres were adjoined closely to each other by pseudopod-like structures (white  
535 arrows). **D.** An early blastula 4.5 h after fertilization. **E.** The internal surface of the lateral region of an

536 embryo 5.5 h after fertilization. Some cells extended pseudopod-like structures to the neighboring cells.  
537 **F, G.** Blastula 6 h after fertilization. By observation of the internal surface of the vegetal plate (G), some  
538 presumptive PMCs were globular (area encircled by the dashed white line). **H, I.** Hatching blastulae 7 h  
539 after fertilization. By observation of the internal surface of the vegetal plate (I), cells around the globular  
540 cells (area encircled by the dashed white line) extended pseudopod-like structures toward this area. **J.** A  
541 mesenchyme blastula 11 h after fertilization (lateral view). PMCs were identified at the vegetal area.  
542 **K–N.** Gastrulae at 12 h (K), 14 h (L), 15 h (M) or 23 h (N) h after fertilization viewed from the  
543 dorso-ventral side. The vegetal plate became thick and then invaginated into the blastocoel (K). SMCs  
544 were identified near the tip of the archenteron and some SMCs had filopodia (black arrows) (L, M). The  
545 tip of archenteron has a diameter larger than that of the blastopore (N). Scale bars B, D, F, H, J–N=50  
546  $\mu\text{m}$ ; C, E, G, I=20  $\mu\text{m}$ .

547

548 **Fig. 4.** Embryonic development of *T. hardwickii*. Embryos observed by light (D–I) or SEM (B, C). **A.**  
549 Schematic diagrams of a morula (upper) and blastula (bottom), lateral view. The area inside the black  
550 boxes was examined by SEM. **B.** The internal surface at the vegetal pole of an embryo 4.5 h after  
551 fertilization. Each cell extended pseudopod-like structures (white arrows) toward the neighboring cells.  
552 **C.** The internal surface at the vegetal pole of an embryo 7 h after fertilization. Some cells had  
553 pseudopod-like structures extended toward the adjacent cells (white arrows). Cells enclosed by the  
554 dashed white line were identified as the globular cells. **D.** A mesenchyme blastula 11 h after fertilization.  
555 **E–I.** Gastrulae at 13 h (E), 14 h (F), 16 h (G), 17 h (H) or 21 h (I) after fertilization (dorso-ventral views).  
556 The invagination is slightly curved (E, F) and then the archenteron became thin (G). The length and  
557 shape of the archenteron did not change for a while. SMCs occurred and they moved into the blastocoel  
558 and formed filopodia (G, H). Finally, invagination was completed (I). Scale bars B, C=20  $\mu\text{m}$ ; D–G=50  
559  $\mu\text{m}$ .

560

561 **Fig. 5.** Embryonic development of *M. globulus*. Embryos observed by light (C, I–N) or SEM (B, D–H).  
562 **A.** Schematic diagrams of a morula (upper) and blastula (bottom), lateral view. The area inside the black  
563 boxes was examined by SEM. **B.** The internal surface structure at the vegetal pole at 3.5 h after  
564 fertilization. Each blastomere adjoined closely. **C–E.** Early blastulae 4.5 h after fertilization. Cells at the  
565 lateral region with intricate elongated pseudopod-like structures (D). Some specimens had granular  
566 structures on the surface of the blastular wall (E: higher magnification of area inside white box in the  
567 insert). **F.** The internal surface at the lateral region of an embryo 6 h after fertilization. **G, H.** The internal  
568 surface at the vegetal plate of early mesenchyme blastulae 10 h (G) or 11 h (H) after fertilization. In the

569 area enclosed by the dashed white circle are orbicular cells that have started to ingress into the blastocoel  
570 as PMCs (H). **I.** A mesenchyme blastula 12 h after fertilization (lateral view). **J–N.** Gastrulae 14 h (J), 15  
571 h (K), 16 h (L), 17 h (M) or 21 h (N) after fertilization (dorso-ventral views). The invaginating vegetal  
572 plate is shaped like a hemisphere (J). When the archenteron had invaginated by approximately one fifth  
573 of the total length of the embryo (L), the tip of archenteron was flat and released SMCs. Some SMCs  
574 formed filopodia (black arrows) and moved in the blastocoel (K–M). Without attachment of the  
575 archenteron to the apical plate, the invagination finished (N). Scale bars B, D–G=20  $\mu\text{m}$ ; C, H–M=50  
576  $\mu\text{m}$ .

577

578 **Fig. 6.** Pattern of invagination of the archenteron in four temnopleurids. **A.** A schematic diagram of a  
579 gastrula derived from Fig. 1 for measurements to find the invagination ratio. **B.** *T. toreumaticus*. **C.** *T.*  
580 *reevesii*. **D.** *T. hardwickii*. **E.** *M. globulus*. Y- and X-axes show the invagination ratio (%) or the time  
581 after initiation of invagination. Gray areas show the secondary invagination. The timing of SMCs  
582 appearance or SMCs with filopodia show the stage when over 60% of specimens have these features.  
583 Bars: SDs.

584

585 **Fig. 7.** Ratio of the diameter of blastopore to the total width of embryo in four temnopleurids. **A.** A  
586 schematic diagram of a gastrula for measurement to find the ratio of the blastopore. **B.** *T. toreumaticus*.  
587 **C.** *T. reevesii*. **D.** *T. hardwickii*. **E.** *M. globulus*. Y- and X-axes show the ratio of the blastopore (%) or the  
588 time after initiation of invagination. Bars: SDs.

589

590 **Fig. 8.** Diameter of the archenteron and thickness of the archenteron wall in four temnopleurids. **A.** A  
591 schematic diagram of a gastrula for measurement of the diameter of the archenteron and measurement to  
592 find the thickness of the archenteron wall. **B, C.** *T. toreumaticus*. **D, E.** *T. reevesii*. **F, G.** *T. hardwickii*. **H,**  
593 **I.** *M. globulus*. Y- and X-axes show the diameter of the archenteron (B, D, F, H) and thickness of the  
594 archenteron wall (C, E, G, I) or the time after initiation of invagination. Bars: SDs.

595

596 **Fig. 9.** The diameter of the tip of the archenteron in four temnopleurids. **A.** A schematic diagram of a  
597 gastrula for measurement of the outer and inner diameter of the tip of the archenteron. **B, C.** *T.*  
598 *toreumaticus*. **D, E.** *T. reevesii*. **F, G.** *T. hardwickii*. **H, I.** *M. globulus*. Y- and X-axes show the outer (B,  
599 D, F, H) and inner diameter of the tip of the archenteron (C, E, G, I) or the time after initiation of  
600 invagination. Bars: SDs.

601

602 **Fig. 10.** Summary of blastula and gastrula formation in four temnopleurids.

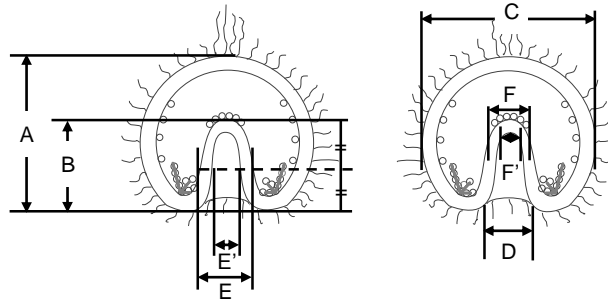

Fig. 1. Kitazawa *et al.*

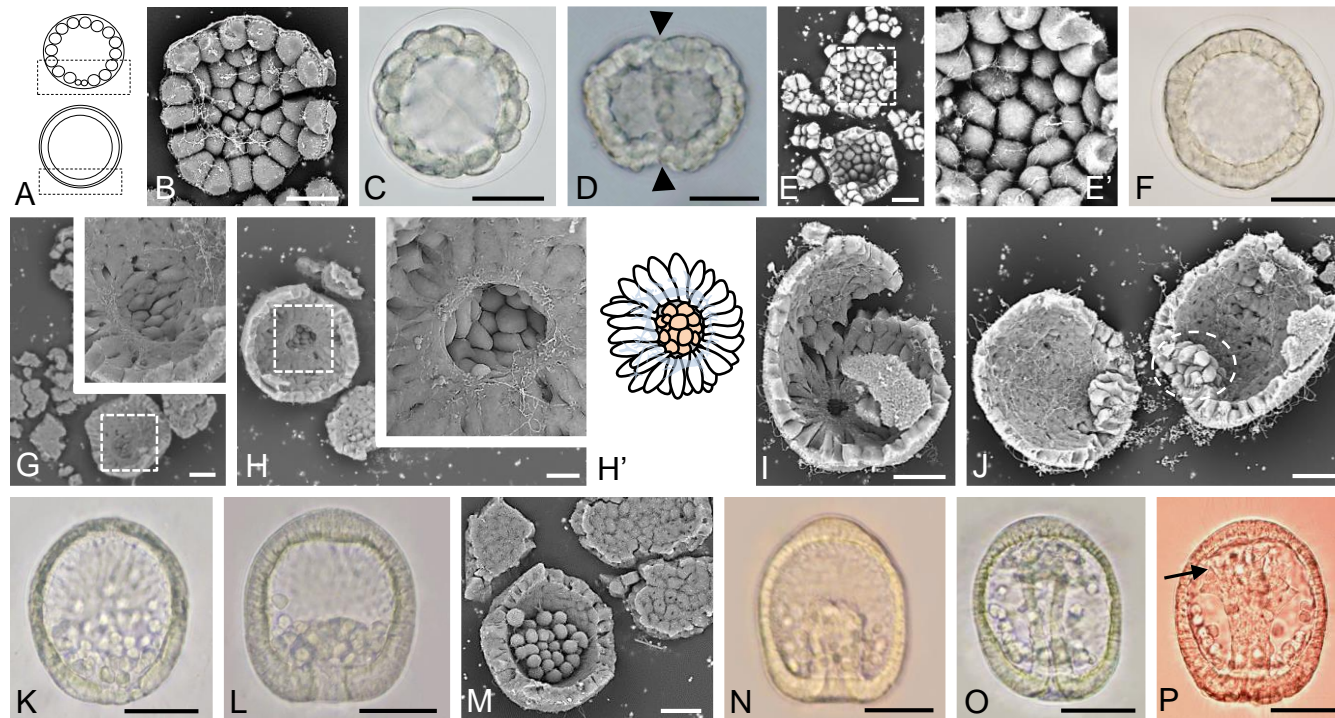

Fig. 2. Kitazawa *et al.*



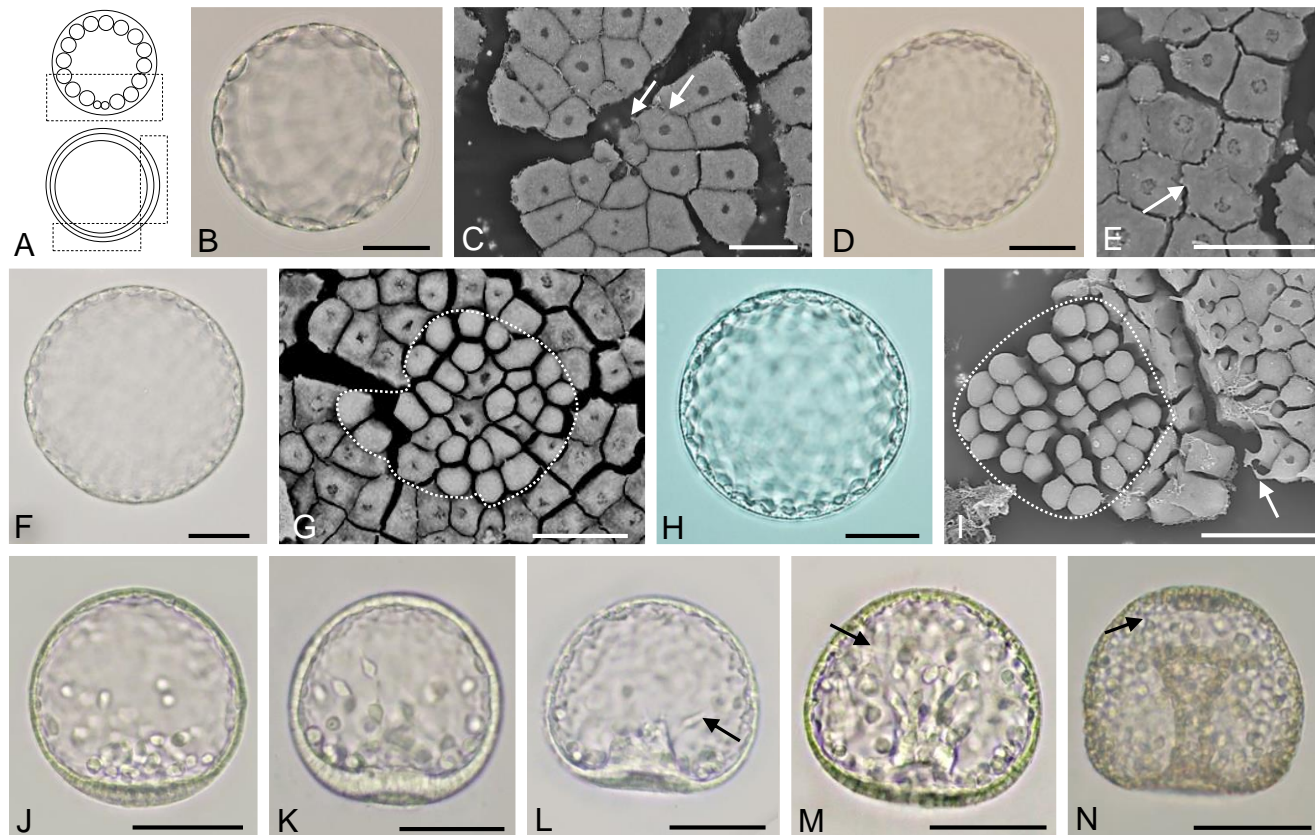

Fig. 3. Kitazawa *et al.*

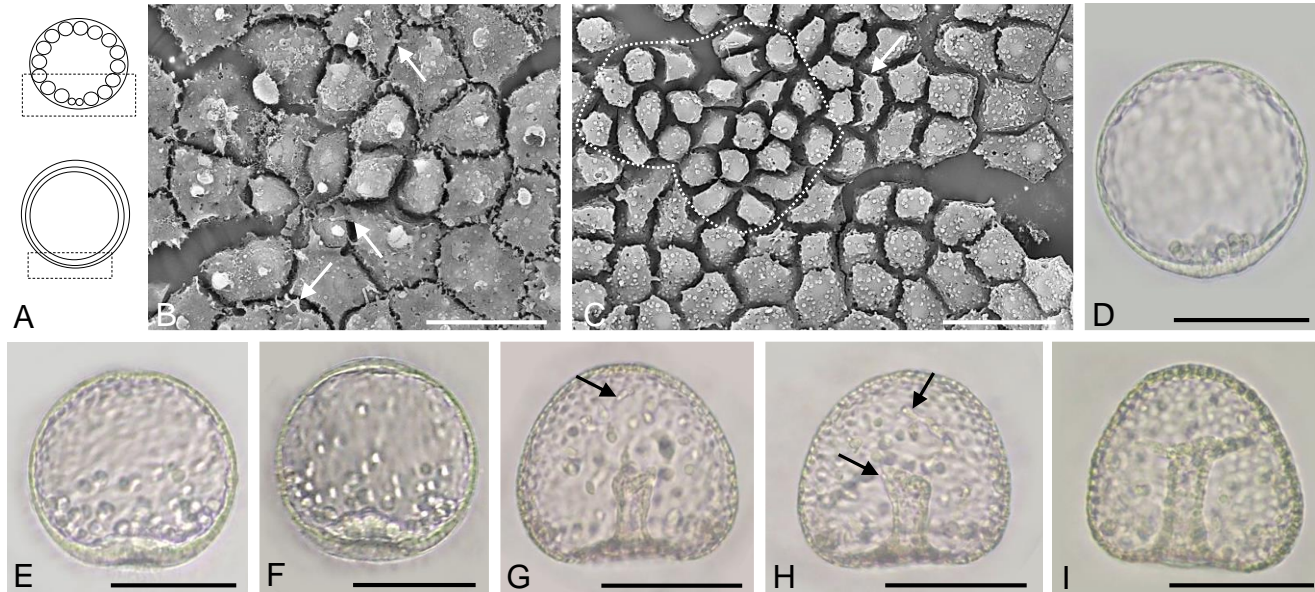

Fig. 4. Kitazawa *et al.*

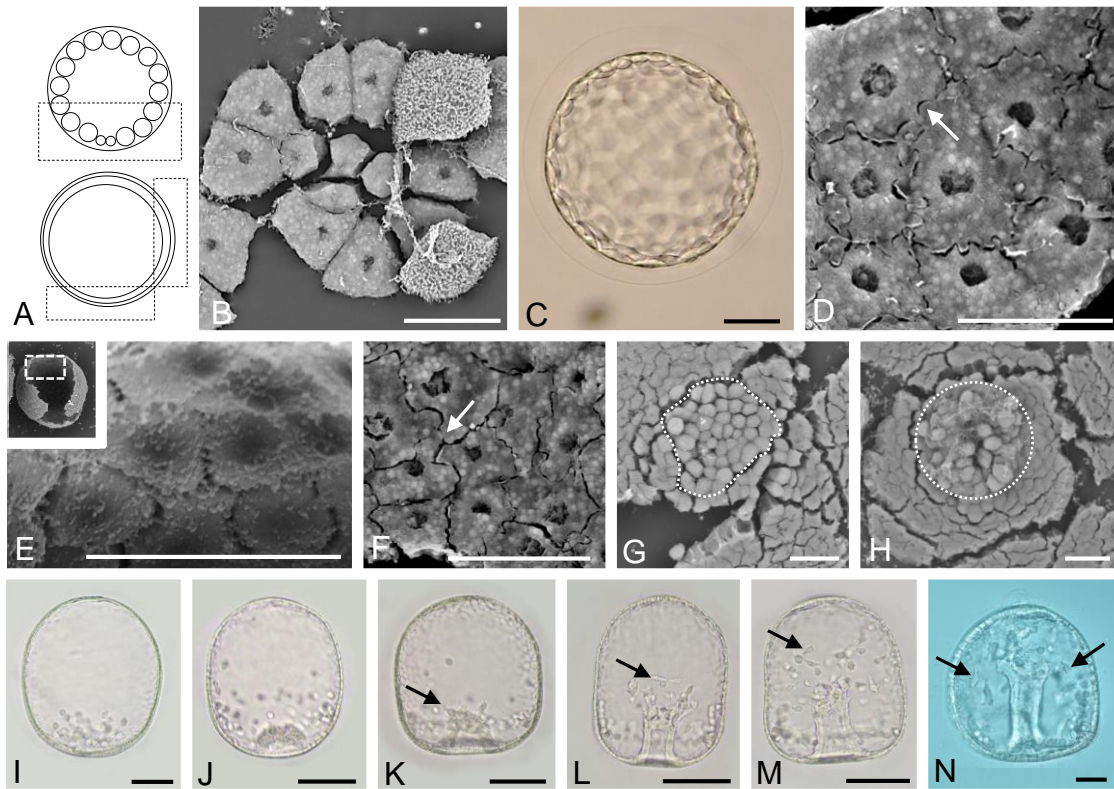

Fig. 5. Kitazawa *et al.*

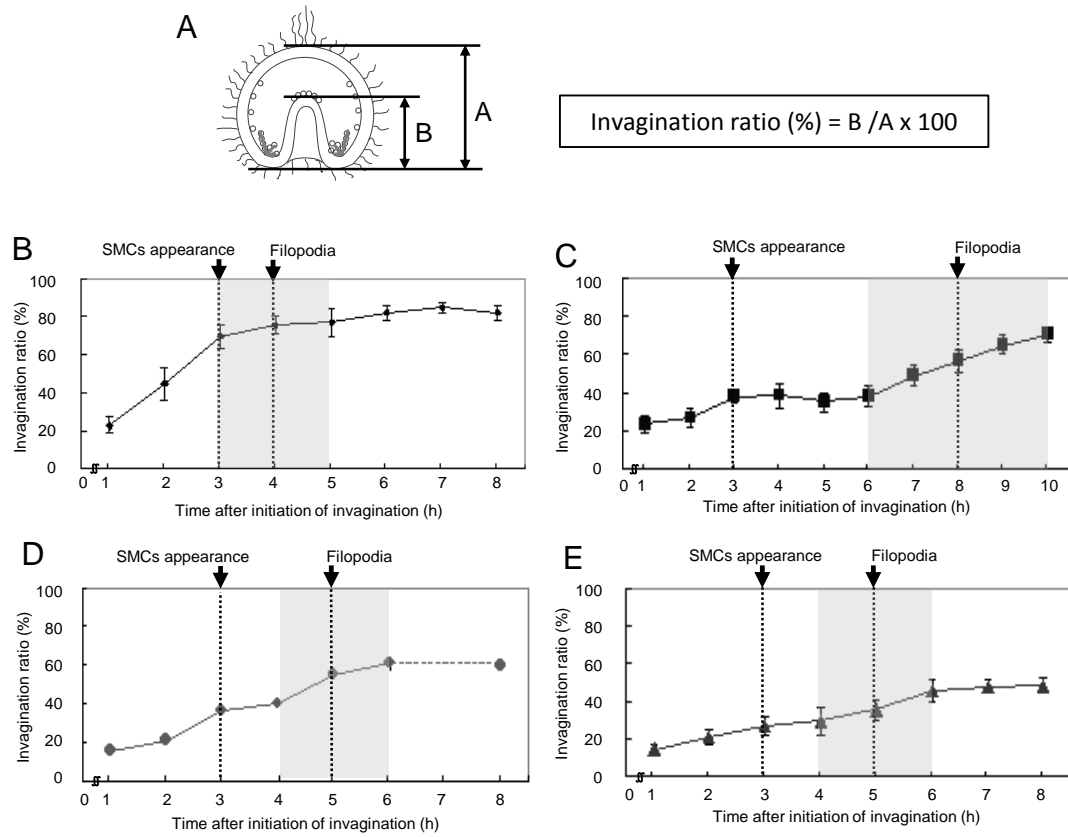

Fig. 6. Kitazawa *et al.*

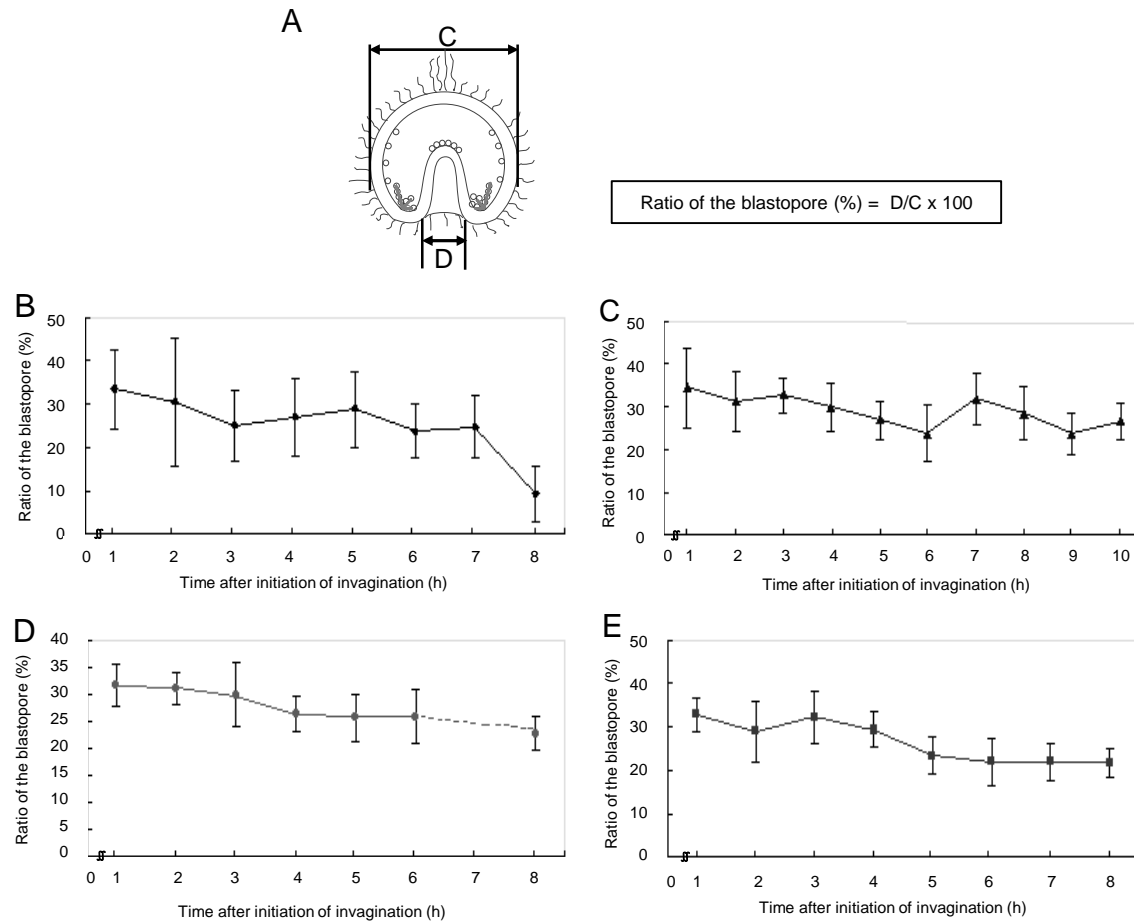

Fig. 7. Kitazawa *et al.*

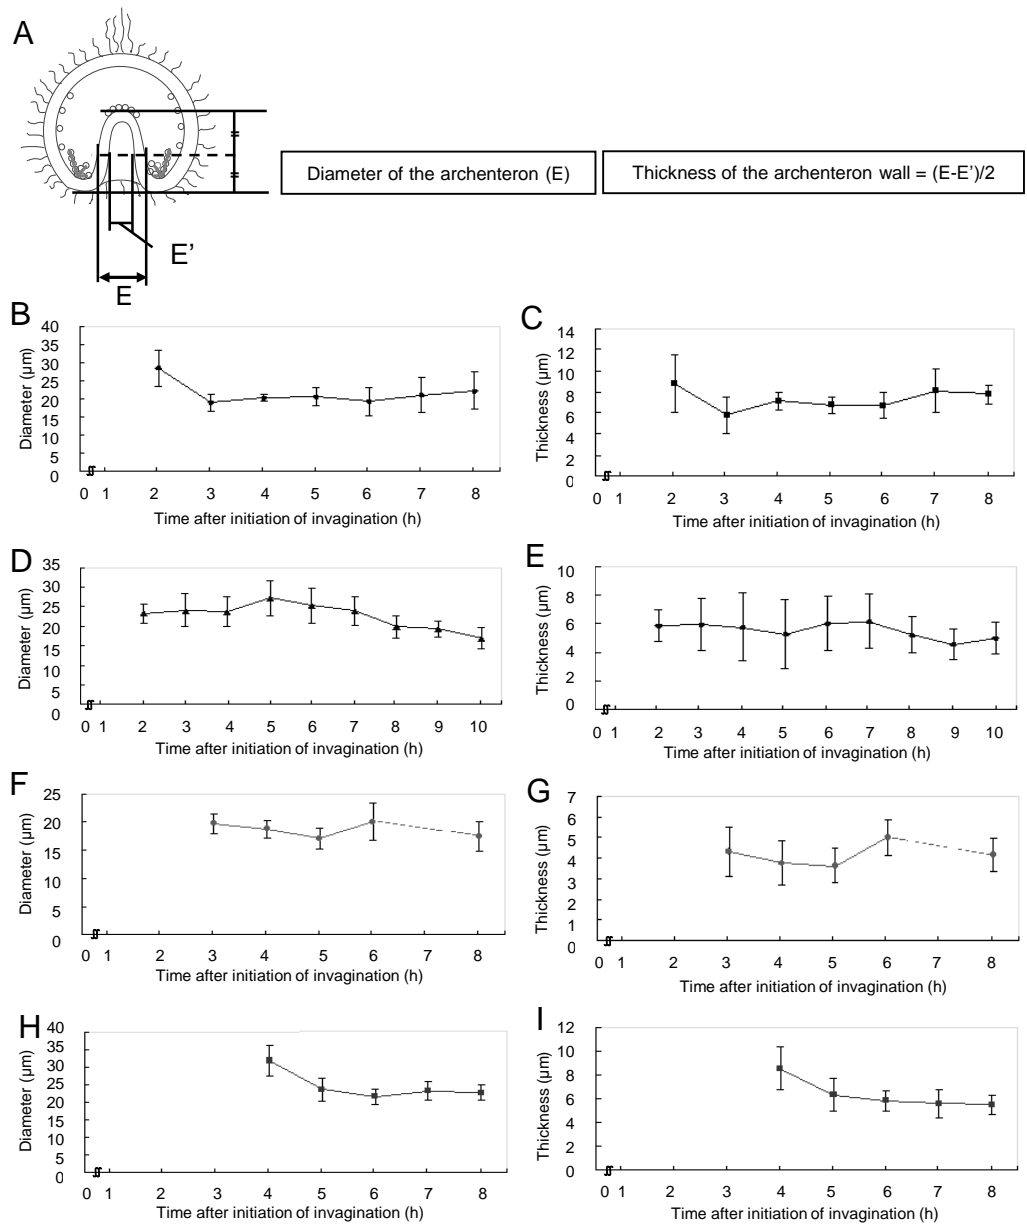

Fig. 8. Kitazawa *et al.*

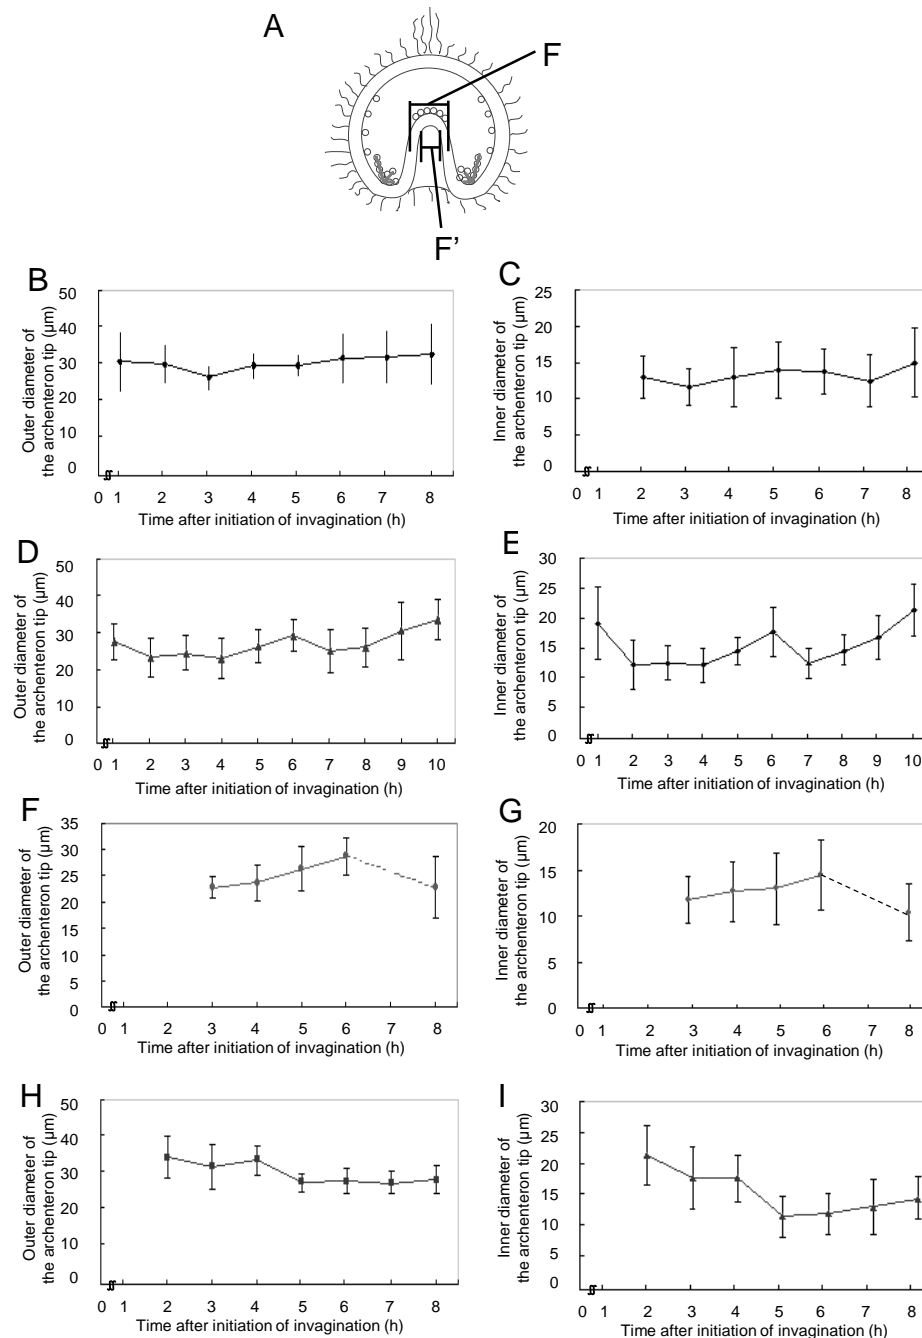

Fig. 9. Kitazawa *et al.*

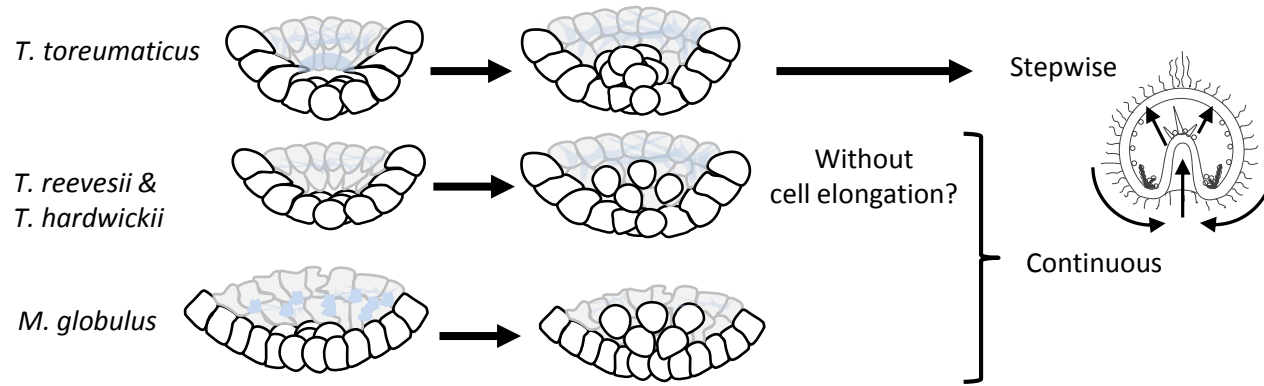

Fig. 10. Kitazawa *et al.*



1 **Table 1.** Summary of blastula features of four temnoleurids.

| Species                | Globular cell appearance* | Hole-like structure | Pseudopod-like structures  | PMC ingression* | Ingression pattern of early PMCs |
|------------------------|---------------------------|---------------------|----------------------------|-----------------|----------------------------------|
| <i>T. toreumaticus</i> | 5.5–6 h                   | Yes                 | To a hole-like structure   | 8.5–9 h         | En masse                         |
| <i>T. reevesii</i>     | 5.5–6 h                   | No                  | To PMCs/<br>Blastular wall | 7.5–8 h         | Separately                       |
| <i>T. hardwickii</i>   | –9 h                      | No                  | To PMCs/<br>Blastular wall | 9.5–10.5 h      | Separately                       |
| <i>M. globulus</i>     | 9.5–10 h                  | No                  | Blastular wall             | 11.5–12 h       | Separately                       |

2 \*Hour after fertilization.

1 **Table 2.** Summary of gastrulation of four temnoleurids.

| Species                | Factors of elongating archenteron |                |                 |                    |                |
|------------------------|-----------------------------------|----------------|-----------------|--------------------|----------------|
|                        | Invagination type                 | Cell migration | Cell elongation | Cell rearrangement | Towing by SMCs |
| <i>T. toreumaticus</i> | Continuous*                       | Yes            | Yes             | Yes                | No?            |
| <i>T. reevesii</i>     | Stepwise                          | No?            | No              | Yes                | Yes?           |
| <i>T. hardwickii</i>   | Stepwise                          | Yes            | No              | Yes                | Yes?           |
| <i>M. globulus</i>     | Stepwise*                         | Yes            | Yes             | Yes                | No*/Yes?       |

2 \*The report of Takata and Kominami (2004) also showed that *T. toreumaticus* invaginates continuously  
3 and *M. globulus* invaginates stepwise without conspicuous rearrangement.

4
